# Supplementary material
Source: HighWire-hosted journal article supplement (https://www.canjsurg.ca/highwire/filestream/96736/field_highwire_adjunct_files/0/cjs-010415-1-at.pdf)
Supplement: cjs-010415-1-at.pdf [file cjs-010415-1-at.pdf]

DOI: 10.1503/cjs.010415

Copyright © 2016 The Author(s) or their employer(s).  
To receive this resource in an accessible format, please contact us at [cmajgroup@cmaj.ca](mailto:cmajgroup@cmaj.ca).

*Online appendices are unedited and posted as supplied by the authors.*

**Supplementary data 1: AOS-Fr.** Translated and validated French version of the AOS.

**Échelle d'Arthrose de la Cheville (AOS-Fr)**

**DIRECTIVES :** La ligne qui se trouve au bout de chaque énoncé représente l'intensité de la **douleur** que vous avez généralement ressentie lorsque vous avez effectué les activités décrites ci-dessous. L'extrémité gauche de la ligne représente « Aucune douleur » tandis que l'extrémité droite représente « La pire douleur imaginable ». Veuillez indiquer sur cette ligne, **à l'aide d'une marque**, à quelle intensité correspond la douleur ressentie à votre cheville quand vous avez pratiqué ces activités au cours de la **dernière semaine**. Si l'activité décrite ne s'applique pas à vous, inscrivez s.o. (sans objet).

**QUESTIONS :** Quelle était l'intensité de la douleur ressentie à votre cheville

**EXEMPLE :**

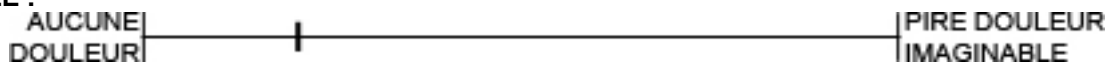

1. Au pire moment ?

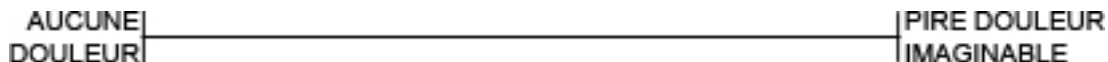

2. Avant de vous lever le matin ?

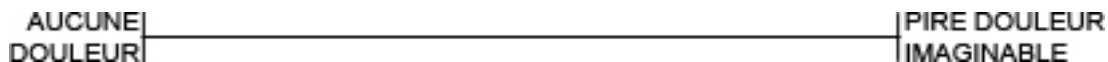

3. En marchant pieds nus ?

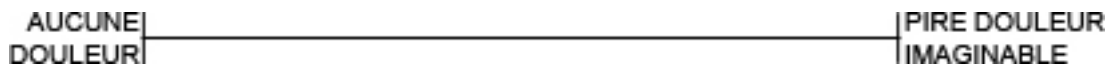

4. En vous tenant debout pieds nus ?

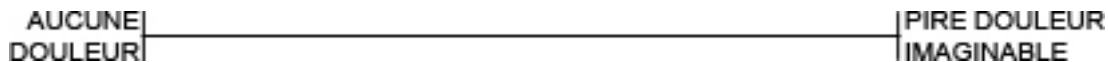

5. En marchant avec des chaussures ?

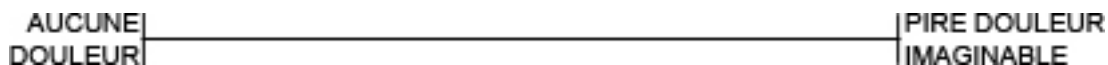

6. En vous tenant debout avec des chaussures ?

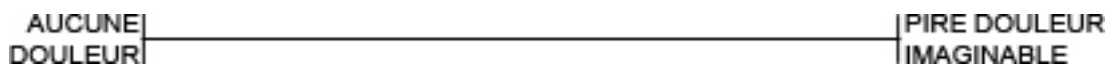

7. En marchant avec des chaussures munies d'orthèses plantaires ou avec une chevillière ?

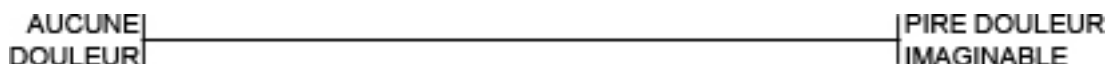

DOI: 10.1503/cjs.010415

*Online appendices are unedited and posted as supplied by the authors.*

8. En vous tenant debout avec des chaussures munies d'orthèses plantaires ou avec une cheville ?

AUCUNE DOULEUR |-----| PIRE DOULEUR IMAGINABLE

9. À la fin de la journée ?

AUCUNE DOULEUR |-----| PIRE DOULEUR IMAGINABLE

### Échelle d'Arthrose de la Cheville (AOS-Fr)

**DIRECTIVES** : La ligne qui se trouve au bout de chaque énoncé représente le degré de **difficulté** que vous avez éprouvé lorsque vous avez effectué les activités décrites ci-dessous. L'extrémité gauche de la ligne représente « Aucune difficulté » tandis que l'extrémité droite représente « Impossible à effectuer ». Veuillez indiquer sur cette ligne, **à l'aide d'une marque**, le degré de difficulté que vous avez éprouvé, **à cause de votre cheville**, quand vous avez pratiqué ces activités au cours de la **dernière semaine**. Si l'activité décrite ne s'applique pas à vous, inscrivez s.o. (sans objet).

**QUESTIONS** : Quel **degré de difficulté** avez-vous éprouvé

**EXEMPLE** :

AUCUNE DIFFICULTÉ |-----| IMPOSSIBLE À EFFECTUER

1. En marchant dans la maison ?

AUCUNE DIFFICULTÉ |-----| IMPOSSIBLE À EFFECTUER

2. En marchant dehors sur un terrain inégal ?

AUCUNE DIFFICULTÉ |-----| IMPOSSIBLE À EFFECTUER

3. En marchant quatre pâtés de maison ou plus ?

AUCUNE DIFFICULTÉ |-----| IMPOSSIBLE À EFFECTUER

4. En montant un escalier ?

AUCUNE DIFFICULTÉ |-----| IMPOSSIBLE À EFFECTUER

5. En descendant un escalier ?

AUCUNE DIFFICULTÉ |-----| IMPOSSIBLE À EFFECTUER

6. En vous tenant sur la pointe des pieds ?

DOI: 10.1503/cjs.010415

*Online appendices are unedited and posted as supplied by the authors.*

AUCUNE | \_\_\_\_\_ | IMPOSSIBLE À  
DIFFICULTÉ | EFFECTUER

7. En vous levant d'une chaise ?

AUCUNE | \_\_\_\_\_ | IMPOSSIBLE À  
DIFFICULTÉ | EFFECTUER

8. En montant ou en descendant une bordure de trottoir ?

AUCUNE | \_\_\_\_\_ | IMPOSSIBLE À  
DIFFICULTÉ | EFFECTUER

9. En marchant vite ou en courant ?

AUCUNE | \_\_\_\_\_ | IMPOSSIBLE À  
DIFFICULTÉ | EFFECTUER
